# Supplementary material
Source: publisher site journal article supplement (http://www.spandidos-publications.com/549/downloadSupplementary)

Figure S1. CSE overexpression in HPAECs. HPAECs were transfected with a vector or CSE plasmid as described in the materials and methods. Expression level of CSE was examined using western blotting. The data are presented as the mean  $\pm$  standard error of the mean of at least three independent experiments. \* $P < 0.05$  vs. the control or HPAECs transfected with vector. HPAECs, human pulmonary artery endothelial cells; CSE, cystathionine  $\gamma$ -lyase.

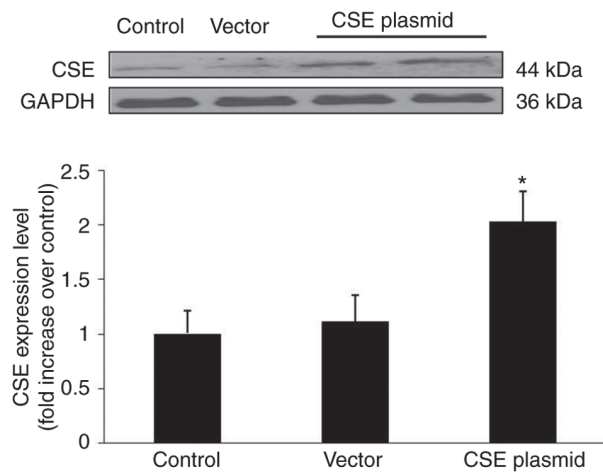

Supplement: Supplementary file 1 [file downloadSupplementary]
